# Supplementary material
Source: HighWire-hosted journal article supplement (https://tech.snmjournals.org/highwire/filestream/8634/field_highwire_adjunct_files/0/jnmt101246_Supplemental_Data.pdf)

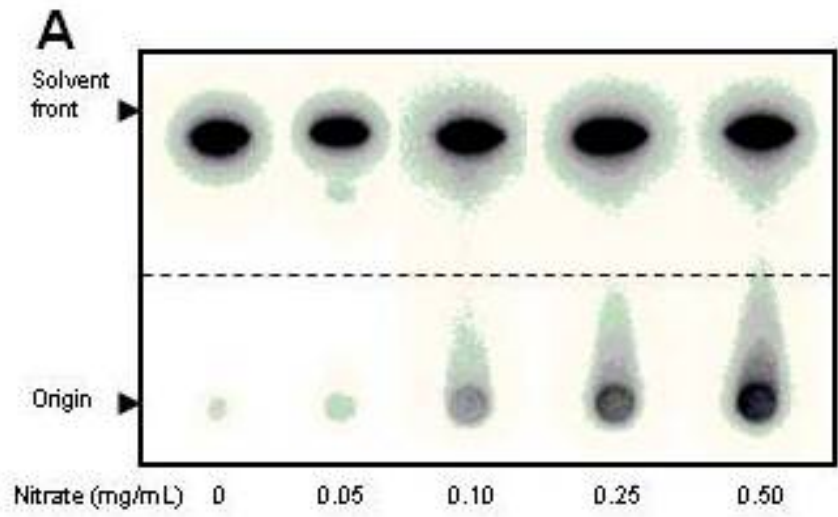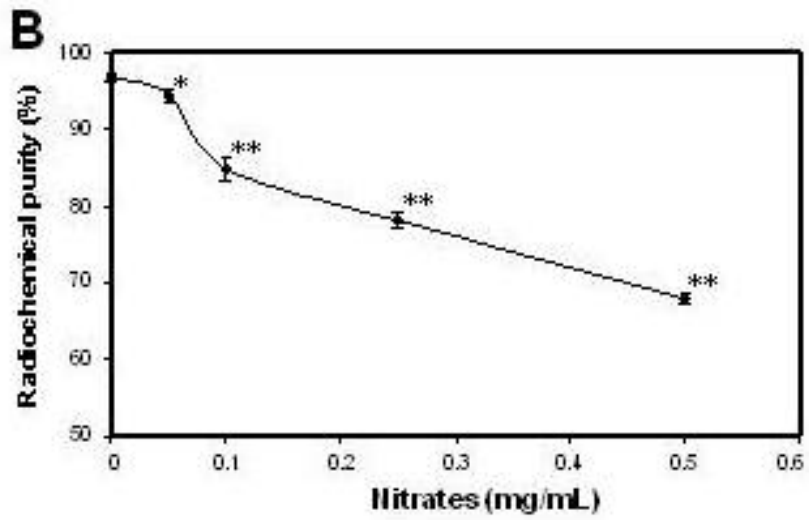

FIGURE 2.

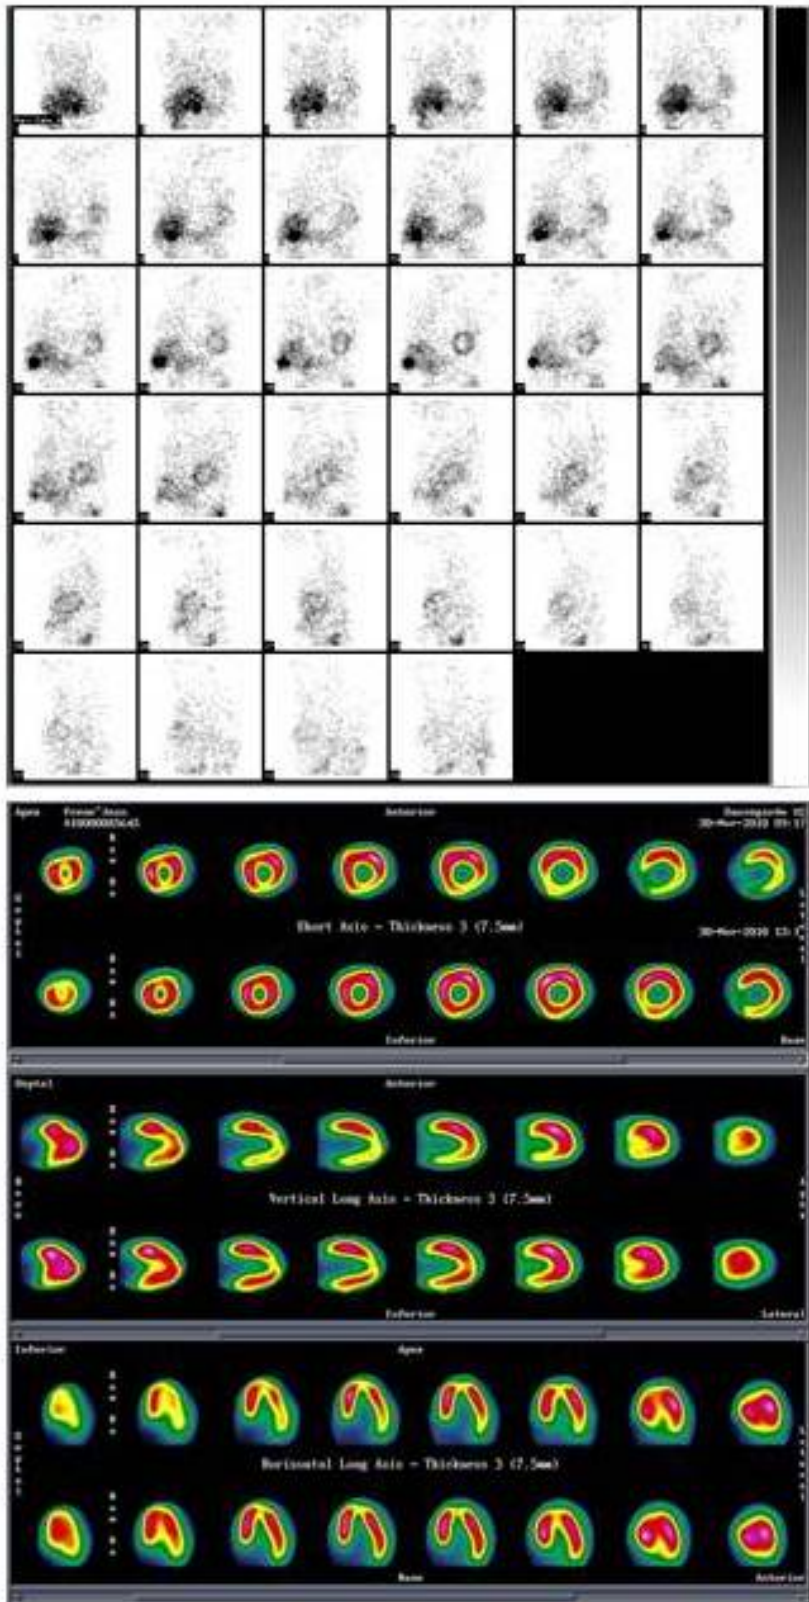

FIGURE 3.

Supplement: jnmt101246_Supplemental_Data.pdf [file jnmt101246_Supplemental_Data.pdf]
